# Supplementary material for: New mixed-ligand Zn(ii)-based MOF as a nanocarrier platform for improved antibacterial activity of clinically approved drug levofloxacin
Source: Royal Society of Chemistry journal article supplement (doi:10.1039/d3nj00114h), 2023-01-01
Supplement: d3nj00114h1.pdf [file d3nj00114h1.pdf]

## Supplementary Information

### New mixed-ligand Zn(II)-based MOF as a nanocarrier platform for improved antibacterial activity of clinically approved drug Levofloxacin.

Zia ul Haq Bhat <sup>a</sup>, Summaiya Hanif <sup>a</sup>, Zeeshan Rafi <sup>b</sup>, Mohammad Jane Alam <sup>c</sup>, Musheer Ahmad <sup>d</sup>, M. Shakir <sup>a,\*</sup>

<sup>a</sup> Division of Inorganic Chemistry, Department of Chemistry, Aligarh Muslim University Aligarh (202002), India.

<sup>b</sup> Department of Bioengineering, Integral University Lucknow (226026), India.

<sup>c</sup> Department of Physics, Aligarh Muslim University Aligarh (202002) India.

<sup>d</sup> Department of Applied Chemistry, Aligarh Muslim University Aligarh (202002) India.

### Experimental

Single crystals of  $[C_{60}H_{48}N_6O_{15}Zn_3]_n$  [Zn-nMOF] were colorless block-shaped. A suitable crystal was selected and mounted on a Bruker APEX-II CCD diffractometer. The crystal was kept at 100(2) K during data collection. Using Olex2<sup>1</sup>, the structure was solved with olex2.solve<sup>2</sup> structure solution program using Charge Flipping and refined with the olex2.refine<sup>3</sup> refinement package using Gauss-Newton minimization.

### Crystal structure determination of [Zn-nMOF]

**Crystal Data** for  $C_{60}H_{48}N_6O_{15}Zn_3$  ( $M=1290.276$  g/mol): orthorhombic, space group Pna2<sub>1</sub> (no. 33),  $a = 16.372(3)$  Å,  $b = 21.997(4)$  Å,  $c = 15.285(3)$  Å,  $V = 5504.5(18)$  Å<sup>3</sup>,  $Z = 4$ ,  $T = 100(2)$  K,  $\mu(\text{Mo K}\alpha) = 1.374$  mm<sup>-1</sup>,  $D_{\text{calc}} = 1.557$  g/cm<sup>3</sup>, 74321 reflections measured ( $4.46^\circ \leq 2\theta \leq 56.62^\circ$ ), 13648 unique ( $R_{\text{int}} = 0.1034$ ,  $R_{\text{sigma}} = 0.0802$ ) which were used in all calculations. The final  $R_1$  was 0.0976 ( $I \geq 2\sigma(I)$ ) and  $wR_2$  was 0.2212 (all data).

### Computational details

The dispersion corrected density functional theory (DFT-D3) employing the hybrid of Becke's three-parameter exchange and correlation functional with the Lee-Yang-Parr functional (B3LYP) implemented in Gaussian 09 software<sup>4</sup> was used for geometry optimization calculations of the Zn-nMOF in the ground state. For atoms of the given MOF, mixed basis sets, 6-31G(d,p) + LANL2DZ, were specified. For Zinc atom, effective core potential basis i.e. LANL2DZ was employed while double zeta basis set involving polarization functions i.e. 6-31G(d,p) was utilized to define C, H, N, O atoms. The coordinates for the input geometry were taken from the crystal information file of Zinc-based metal organic framework. The molecular electrostatic potentials (MESP) map and some related theoretical parameters were investigated at same level of theory.

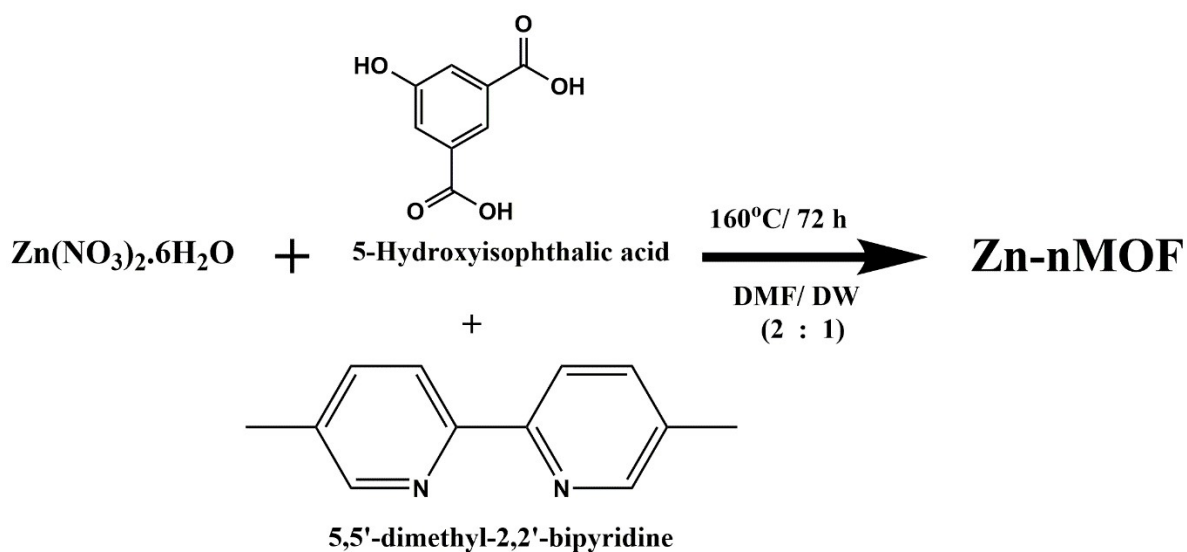

**Figure S1:** Reaction scheme for the synthesis of Zn-nMOF

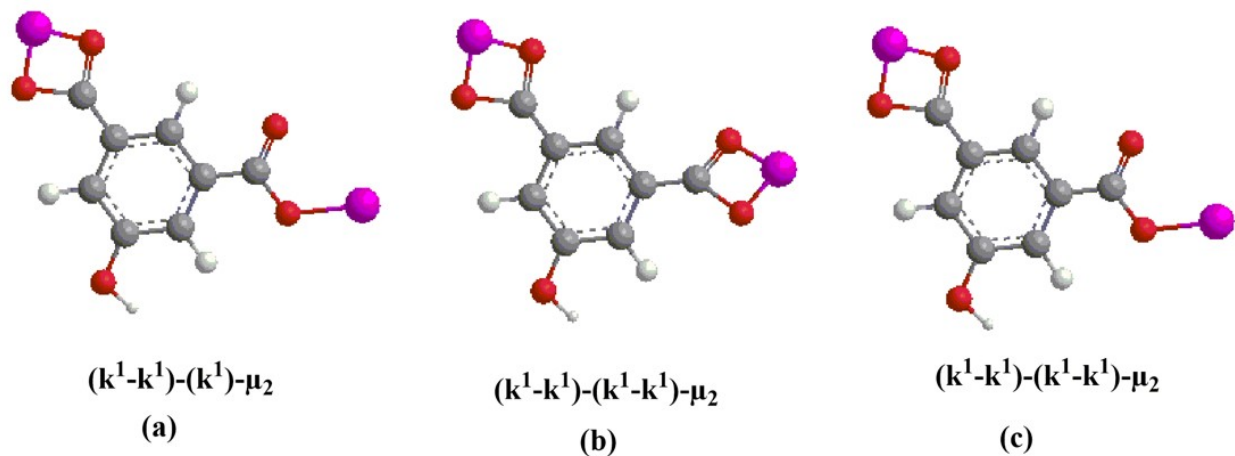

**Figure S2.** Different binding modes of linker 5-hydroxyisophthalic acid in Zn-nMOF.

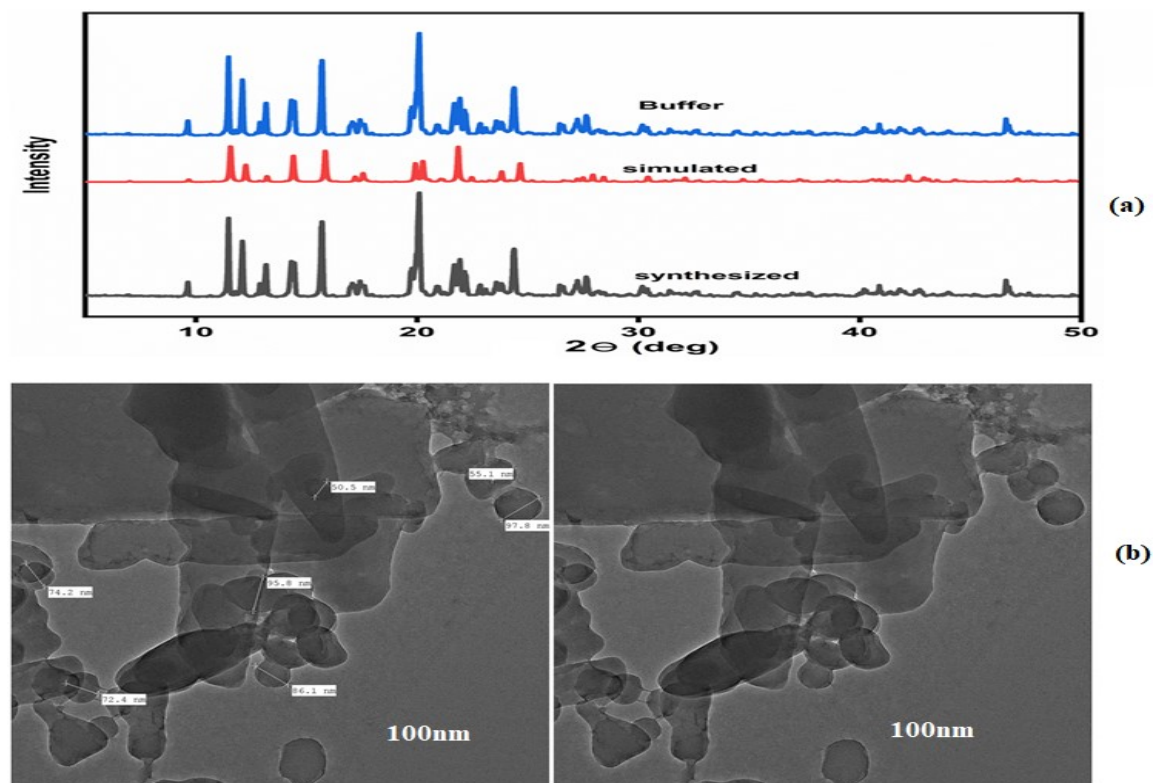

**Figure S3:** (a) PXRD pattern of synthesized, simulated, and after buffer treatment, and (b) TEM images of Zn-nMOF.

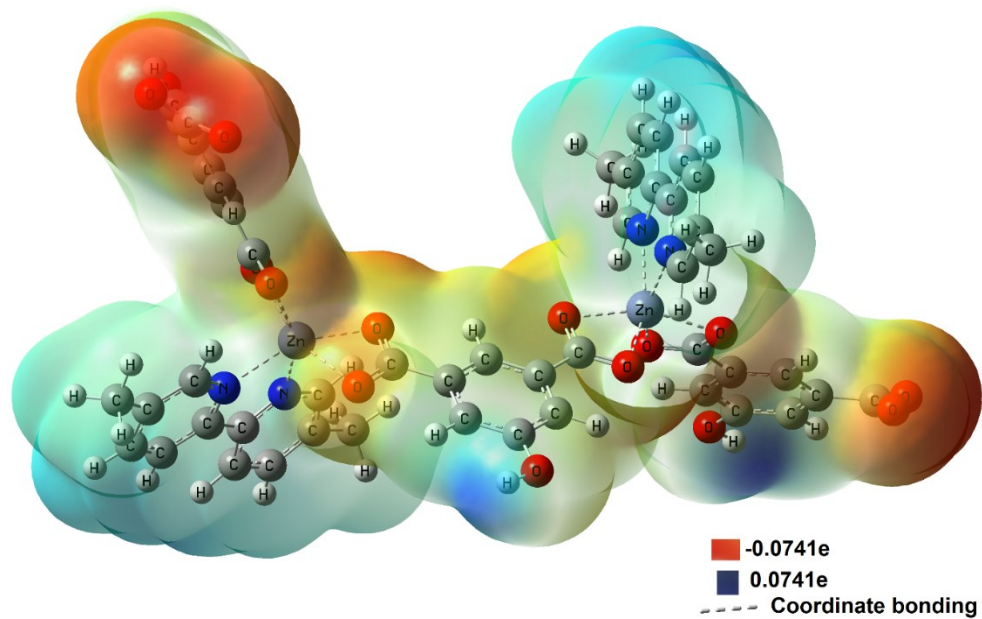

**Figure S4.** MESP map of the Zn-nMOF.

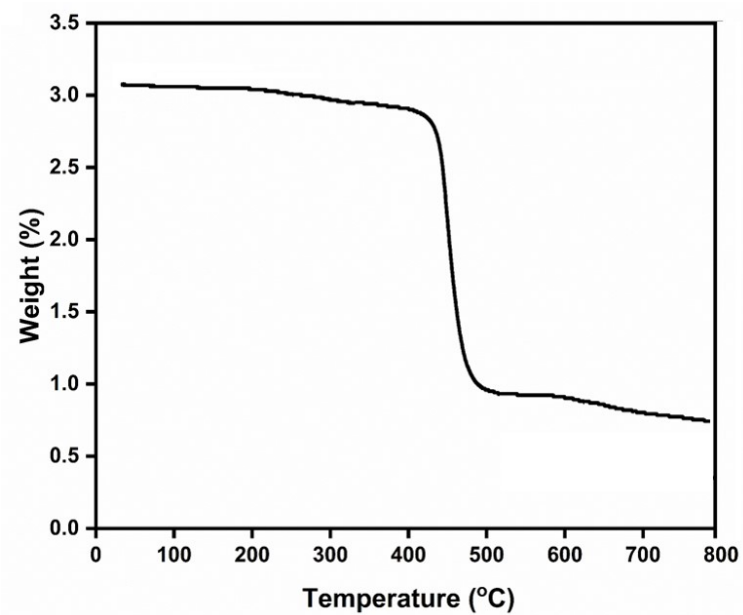

**Figure S5:** Thermogravimetric analysis (TGA) curve of Zn-nMOF.

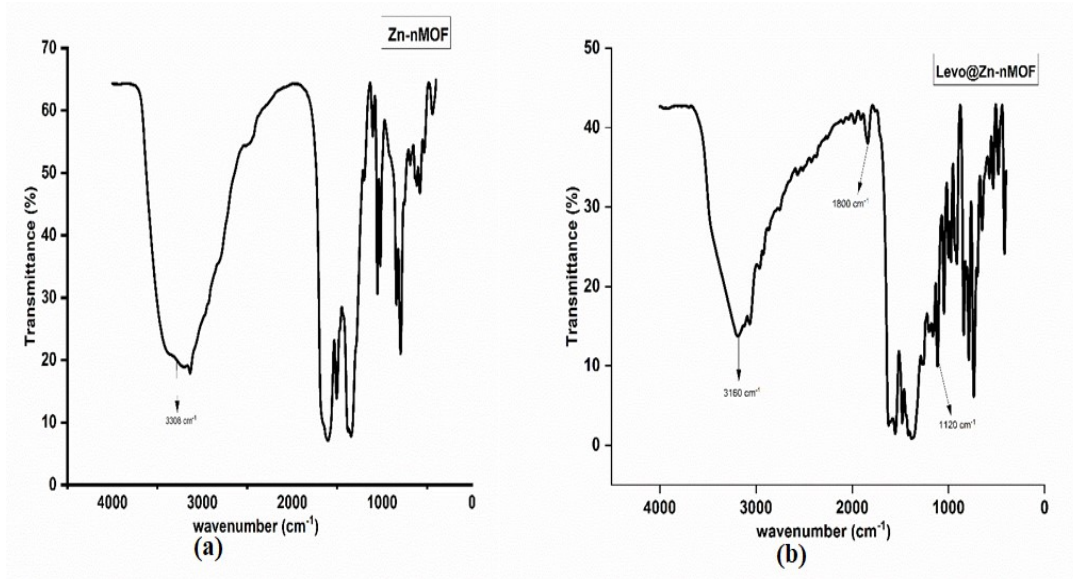

**Figure S6.** (a) IR spectrum of Zn-nMOF and (b) Levo@Zn-nMOF.

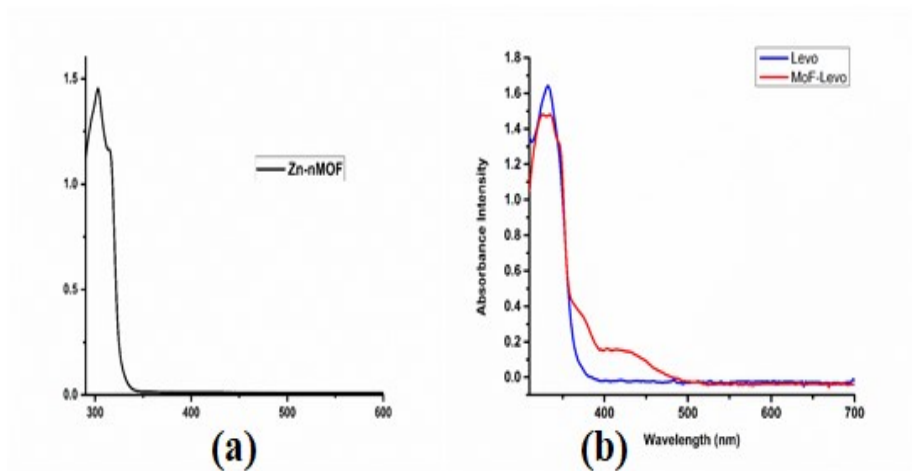

**Figure S7.** (a) UV-visible spectra of pure Zn-nMOF and (b) pure Levofloxacin and Levo@Zn-nMOF

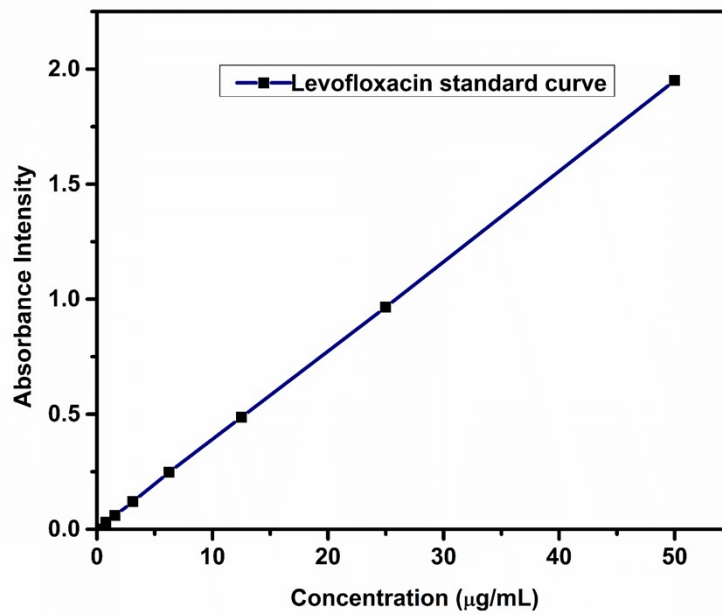

**Figure S8.** Standard curve of pure drug levofloxacin plotted at 290 nm.

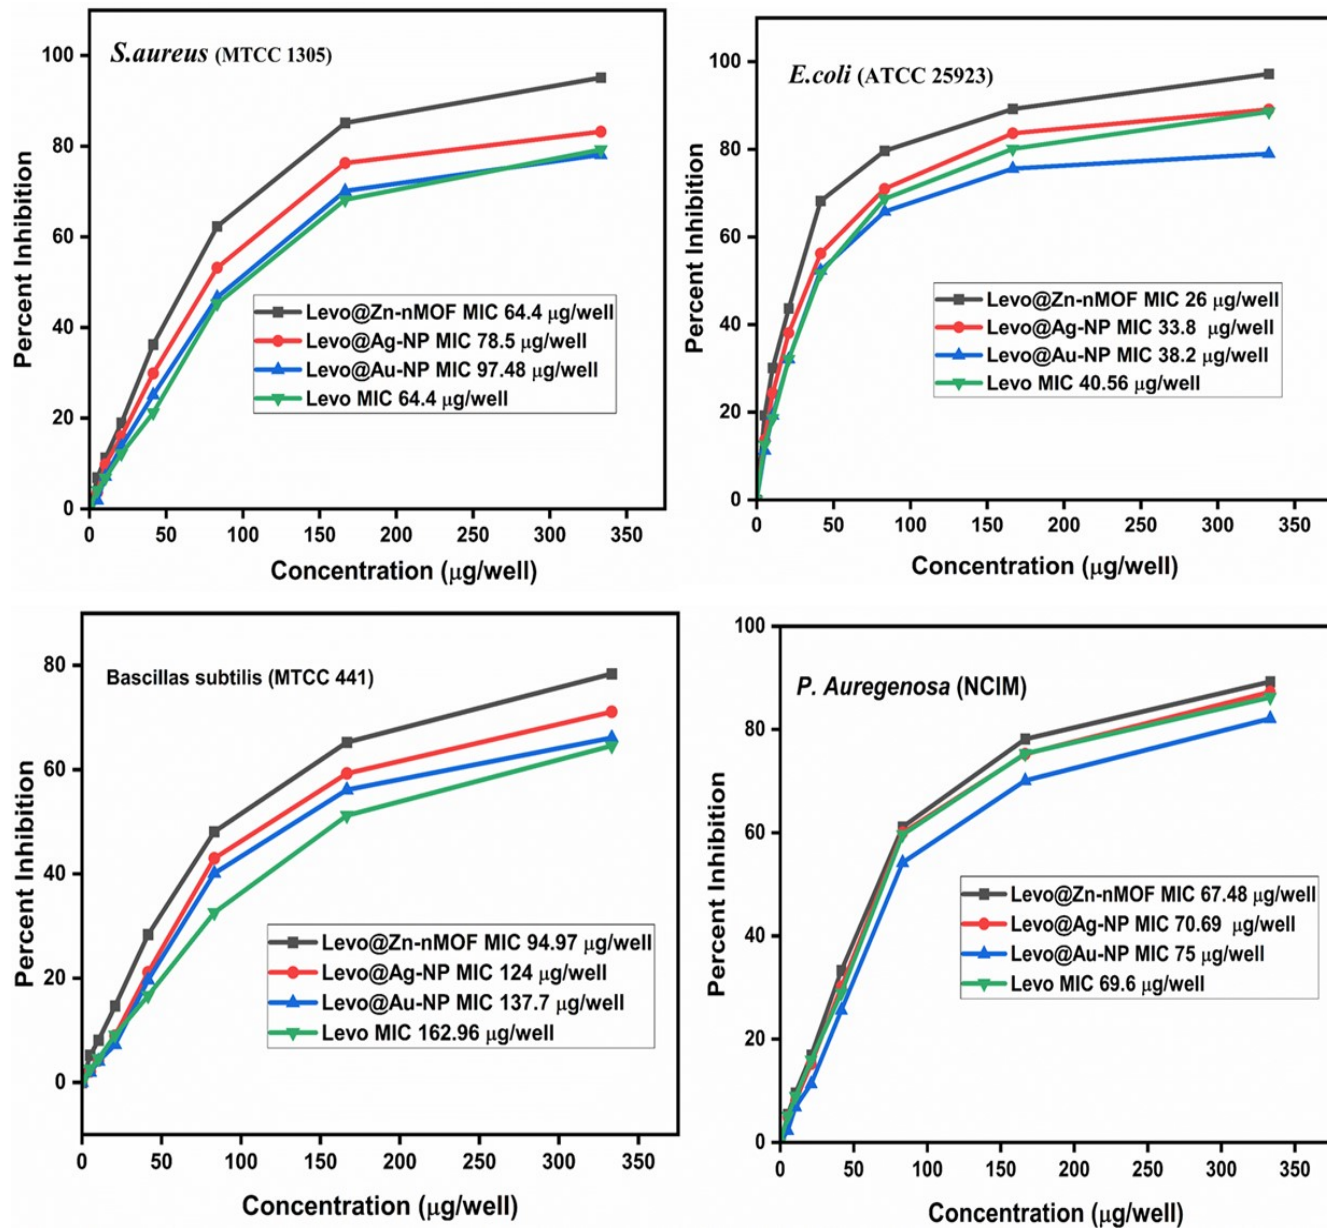

**Figure S9:** Comparative analysis of antibacterial activity of Levo@Zn-nMOF, Levo@Ag-NP, Levo@Au-NP, and pure levofloxacin (levo) drug against the gram-positive and gram-negative bacteria.

**Table S1****Table Crystal data and structure refinement for Zn-nMOF (CCDC 2119311).**

|                                             |                                                                                |
|---------------------------------------------|--------------------------------------------------------------------------------|
| Identification code                         | Zn-nMOF                                                                        |
| Empirical formula                           | C <sub>60</sub> H <sub>48</sub> N <sub>6</sub> O <sub>15</sub> Zn <sub>3</sub> |
| Formula weight                              | 1290.276                                                                       |
| Temperature/K                               | 100(2)                                                                         |
| Crystal system                              | Orthorhombic                                                                   |
| Space group                                 | Pna2 <sub>1</sub>                                                              |
| a/Å                                         | 16.372(3)                                                                      |
| b/Å                                         | 21.997(4)                                                                      |
| c/Å                                         | 15.285(3)                                                                      |
| α/°                                         | 89.71(3)                                                                       |
| β/°                                         | 89.99(3)                                                                       |
| γ/°                                         | 89.98(3)                                                                       |
| Volume/Å <sup>3</sup>                       | 5504.5(18)                                                                     |
| Z                                           | 4                                                                              |
| ρ <sub>calc</sub> /cm <sup>3</sup>          | 1.557                                                                          |
| μ/mm <sup>-1</sup>                          | 1.374                                                                          |
| F(000)                                      | 2649.3                                                                         |
| Crystal size/mm <sup>3</sup>                | 0.39 × 0.23 × 0.15                                                             |
| Radiation                                   | Mo Kα (λ = 0.71073)                                                            |
| 2θ range for data collection/°              | 4.46 to 56.62                                                                  |
| Index ranges                                | -21 ≤ h ≤ 21, -29 ≤ k ≤ 29, -20 ≤ l ≤ 20                                       |
| Reflections collected                       | 74321                                                                          |
| Independent reflections                     | 13648 [R <sub>int</sub> = 0.1034, R <sub>sigma</sub> = 0.0802]                 |
| Data/restraints/parameters                  | 13648/1/767                                                                    |
| Goodness-of-fit on F <sup>2</sup>           | 1.068                                                                          |
| Final R indexes [I >= 2σ (I)]               | R <sub>1</sub> = 0.0976, wR <sub>2</sub> = 0.1873                              |
| Final R indexes [all data]                  | R <sub>1</sub> = 0.1410, wR <sub>2</sub> = 0.2212                              |
| Largest diff. peak/hole / e Å <sup>-3</sup> | 3.76/-5.84                                                                     |



**Table S2 Bond Lengths for Zn-nMOF**

| <b>Atom</b> | <b>Atom</b>      | <b>Length/Å</b> | <b>Atom</b> | <b>Atom</b> | <b>Length/Å</b> |
|-------------|------------------|-----------------|-------------|-------------|-----------------|
| Zn3         | O14 <sup>1</sup> | 2.322 (7)       | O7          | C33         | 1.303 (14)      |
| Zn3         | O15 <sup>1</sup> | 2.075 (6)       | O10         | C37         | 1.237 (15)      |
| Zn3         | O12              | 1.917 (7)       | O8          | C39         | 1.382 (10)      |
| Zn3         | N5               | 2.088 (7)       | O5          | C20         | 1.326 (11)      |
| Zn3         | N6               | 2.060 (9)       | O3          | C16         | 1.385 (13)      |
| Zn3         | C60 <sup>1</sup> | 2.548 (10)      | N4          | C27         | 1.337 (13)      |
| O11         | C54              | 1.210 (12)      | N4          | C32         | 1.350 (12)      |
| O14         | C60              | 1.308 (9)       | N3          | C26         | 1.381 (13)      |
| O13         | C57              | 1.397 (11)      | N3          | C21         | 1.341 (13)      |
| O15         | C60              | 1.254 (11)      | N2          | C12         | 1.305 (17)      |
| O12         | C54              | 1.308 (10)      | N2          | C7          | 1.414 (14)      |
| N5          | C48              | 1.379 (12)      | N1          | C6          | 1.296 (17)      |
| N5          | C53              | 1.347 (10)      | N1          | C1          | 1.34 (2)        |
| N6          | C47              | 1.325 (12)      | C38         | C36         | 1.386 (13)      |
| N6          | C42              | 1.365 (11)      | C38         | C39         | 1.393 (13)      |
| C54         | C55              | 1.490 (11)      | C36         | C35         | 1.372 (13)      |
| C58         | C59              | 1.394 (12)      | C36         | C37         | 1.529 (13)      |
| C58         | C57              | 1.374 (13)      | C25         | C26         | 1.393 (12)      |
| C60         | C59              | 1.507 (13)      | C25         | C24         | 1.390 (13)      |
| C61         | C59              | 1.399 (13)      | C26         | C27         | 1.502 (13)      |
| C61         | C55              | 1.385 (13)      | C39         | C40         | 1.386 (14)      |
| C48         | C47              | 1.473 (11)      | C30         | C31         | 1.509 (16)      |
| C48         | C49              | 1.369 (13)      | C30         | C32         | 1.389 (14)      |
| C47         | C46              | 1.398 (12)      | C30         | C29         | 1.348 (17)      |
| C53         | C51              | 1.379 (14)      | C5          | C4          | 1.346 (17)      |
| C51         | C50              | 1.436 (17)      | C5          | C6          | 1.446 (17)      |
| C51         | C52              | 1.525 (14)      | C27         | C28         | 1.393 (17)      |
| C46         | C45              | 1.400 (12)      | C35         | C34         | 1.395 (13)      |
| C42         | C43              | 1.421 (14)      | C40         | C34         | 1.429 (13)      |
| C57         | C56              | 1.368 (13)      | C20         | C18         | 1.504 (16)      |
| C56         | C55              | 1.418 (11)      | C24         | C22         | 1.391 (15)      |
| C50         | C49              | 1.405 (15)      | C18         | C17         | 1.370 (14)      |
| C44         | C43              | 1.484 (16)      | C18         | C19         | 1.428 (14)      |
| C43         | C45              | 1.364 (14)      | C12         | C10         | 1.399 (19)      |
| Zn2         | O6               | 1.991 (8)       | C17         | C16         | 1.39 (2)        |
| Zn2         | O5               | 1.932 (7)       | C4          | C2          | 1.32 (2)        |
| Zn2         | N4               | 2.090 (9)       | C22         | C23         | 1.504 (14)      |
| Zn2         | N3               | 2.041 (9)       | C22         | C21         | 1.389 (16)      |

**Table S2 Bond Lengths for Zn-nMOF**

| Atom | Atom             | Length/Å   | Atom | Atom | Length/Å   |
|------|------------------|------------|------|------|------------|
| Zn2  | C33              | 2.575 (9)  | C6   | C7   | 1.450 (18) |
| Zn1  | O2               | 1.962 (8)  | C14  | C19  | 1.411 (14) |
| Zn1  | O9 <sup>2</sup>  | 2.074 (9)  | C14  | C13  | 1.496 (14) |
| Zn1  | O10 <sup>2</sup> | 2.283 (10) | C14  | C15  | 1.404 (13) |
| Zn1  | N2               | 2.002 (10) | C28  | C29  | 1.378 (18) |
| Zn1  | N1               | 2.169 (14) | C33  | C34  | 1.480 (11) |
| Zn1  | C13              | 2.574 (10) | C7   | C8   | 1.405 (15) |
| Zn1  | C37 <sup>2</sup> | 2.491 (10) | C2   | C3   | 1.50 (2)   |
| O2   | C13              | 1.286 (11) | C2   | C1   | 1.45 (2)   |
| O4   | C20              | 1.234 (12) | C9   | C8   | 1.381 (17) |
| O1   | C13              | 1.248 (10) | C9   | C10  | 1.355 (19) |
| O6   | C33              | 1.281 (14) | C15  | C16  | 1.39 (2)   |
| O9   | C37              | 1.279 (14) | C10  | C11  | 1.535 (18) |

<sup>1</sup>1-X,1-Y,-1/2+Z; <sup>2</sup>+X,+Y,-1+Z

**Table S3 Bond Angles for Zn-nMOF.**

| Atom             | Atom | Atom             | Angle/°   | Atom | Atom | Atom             | Angle/°    |
|------------------|------|------------------|-----------|------|------|------------------|------------|
| O15 <sup>1</sup> | Zn3  | O14 <sup>1</sup> | 59.9 (2)  | C37  | O9   | Zn1 <sup>4</sup> | 92.9 (8)   |
| O12              | Zn3  | O14 <sup>1</sup> | 111.4 (3) | C37  | O10  | Zn1 <sup>4</sup> | 84.6 (7)   |
| O12              | Zn3  | O15 <sup>1</sup> | 111.6 (3) | C20  | O5   | Zn2              | 113.0 (6)  |
| N5               | Zn3  | O14 <sup>1</sup> | 140.0 (3) | C27  | N4   | Zn2              | 114.9 (7)  |
| N5               | Zn3  | O15 <sup>1</sup> | 95.5 (3)  | C32  | N4   | Zn2              | 127.8 (7)  |
| N5               | Zn3  | O12              | 106.8 (3) | C32  | N4   | C27              | 117.3 (9)  |
| N6               | Zn3  | O14 <sup>1</sup> | 94.5 (3)  | C26  | N3   | Zn2              | 116.0 (6)  |
| N6               | Zn3  | O15 <sup>1</sup> | 132.8 (3) | C21  | N3   | Zn2              | 125.4 (8)  |
| N6               | Zn3  | O12              | 114.7 (3) | C21  | N3   | C26              | 118.5 (9)  |
| N6               | Zn3  | N5               | 79.5 (3)  | C12  | N2   | Zn1              | 122.8 (9)  |
| C60 <sup>1</sup> | Zn3  | O14 <sup>1</sup> | 30.7 (2)  | C7   | N2   | Zn1              | 114.3 (8)  |
| C60 <sup>1</sup> | Zn3  | O15 <sup>1</sup> | 29.3 (2)  | C7   | N2   | C12              | 122.3 (11) |
| C60 <sup>1</sup> | Zn3  | O12              | 116.1 (3) | C6   | N1   | Zn1              | 114.3 (11) |
| C60 <sup>1</sup> | Zn3  | N5               | 118.7 (3) | C1   | N1   | Zn1              | 126.7 (11) |
| C60 <sup>1</sup> | Zn3  | N6               | 115.7 (3) | C1   | N1   | C6               | 118.9 (14) |
| C60              | O14  | Zn3 <sup>2</sup> | 84.2 (6)  | C39  | C38  | C36              | 118.0 (8)  |
| C60              | O15  | Zn3 <sup>2</sup> | 96.8 (5)  | C35  | C36  | C38              | 122.0 (9)  |
| C54              | O12  | Zn3              | 112.9 (6) | C37  | C36  | C38              | 119.0 (9)  |
| C48              | N5   | Zn3              | 113.1 (5) | C37  | C36  | C35              | 119.0 (9)  |
| C53              | N5   | Zn3              | 126.1 (6) | C24  | C25  | C26              | 119.0 (9)  |

**Table S3 Bond Angles for Zn-nMOF.**

| Atom | Atom | Atom             | Angle/°   | Atom | Atom | Atom | Angle/°   |
|------|------|------------------|-----------|------|------|------|-----------|
| C53  | N5   | C48              | 120.7(7)  | C25  | C26  | N3   | 121.1(8)  |
| C47  | N6   | Zn3              | 115.3(6)  | C27  | C26  | N3   | 113.7(9)  |
| C42  | N6   | Zn3              | 124.0(6)  | C27  | C26  | C25  | 125.0(10) |
| C42  | N6   | C47              | 120.2(8)  | C38  | C39  | O8   | 121.2(8)  |
| O12  | C54  | O11              | 124.1(8)  | C40  | C39  | O8   | 116.8(8)  |
| C55  | C54  | O11              | 121.1(8)  | C40  | C39  | C38  | 122.0(8)  |
| C55  | C54  | O12              | 114.8(8)  | C32  | C30  | C31  | 121.0(10) |
| C57  | C58  | C59              | 118.9(9)  | C29  | C30  | C31  | 123.5(11) |
| O14  | C60  | Zn3 <sup>2</sup> | 65.0(5)   | C29  | C30  | C32  | 115.5(11) |
| O15  | C60  | Zn3 <sup>2</sup> | 53.9(4)   | C6   | C5   | C4   | 113.4(11) |
| O15  | C60  | O14              | 118.9(8)  | C26  | C27  | N4   | 115.9(10) |
| C59  | C60  | Zn3 <sup>2</sup> | 174.7(6)  | C28  | C27  | N4   | 120.0(10) |
| C59  | C60  | O14              | 119.9(8)  | C28  | C27  | C26  | 123.9(10) |
| C59  | C60  | O15              | 121.1(7)  | C34  | C35  | C36  | 120.3(8)  |
| C55  | C61  | C59              | 116.7(8)  | C34  | C40  | C39  | 118.6(8)  |
| C60  | C59  | C58              | 116.2(8)  | O5   | C20  | O4   | 123.4(10) |
| C61  | C59  | C58              | 122.7(9)  | C18  | C20  | O4   | 121.2(9)  |
| C61  | C59  | C60              | 121.0(8)  | C18  | C20  | O5   | 115.4(8)  |
| C47  | C48  | N5               | 115.0(7)  | C22  | C24  | C25  | 119.7(9)  |
| C49  | C48  | N5               | 120.5(8)  | C17  | C18  | C20  | 122.5(10) |
| C49  | C48  | C47              | 124.3(9)  | C19  | C18  | C20  | 117.7(9)  |
| C48  | C47  | N6               | 116.3(8)  | C19  | C18  | C17  | 119.8(11) |
| C46  | C47  | N6               | 120.3(8)  | C10  | C12  | N2   | 122.7(12) |
| C46  | C47  | C48              | 123.4(8)  | C16  | C17  | C18  | 120.6(12) |
| C51  | C53  | N5               | 121.9(9)  | C2   | C4   | C5   | 128.9(14) |
| C50  | C51  | C53              | 118.1(9)  | C23  | C22  | C24  | 121.6(10) |
| C52  | C51  | C53              | 121.6(10) | C21  | C22  | C24  | 118.4(10) |
| C52  | C51  | C50              | 120.3(9)  | C21  | C22  | C23  | 120.0(11) |
| C45  | C46  | C47              | 119.6(9)  | C5   | C6   | N1   | 122.7(12) |
| C43  | C42  | N6               | 122.4(8)  | C7   | C6   | N1   | 115.2(12) |
| C58  | C57  | O13              | 115.6(8)  | C7   | C6   | C5   | 122.0(10) |
| C56  | C57  | O13              | 123.7(8)  | C13  | C14  | C19  | 121.1(8)  |
| C56  | C57  | C58              | 120.6(9)  | C15  | C14  | C19  | 119.4(10) |
| C55  | C56  | C57              | 119.9(9)  | C15  | C14  | C13  | 119.5(9)  |
| C49  | C50  | C51              | 118.8(10) | C29  | C28  | C27  | 120.3(11) |
| C50  | C49  | C48              | 119.9(11) | O6   | C33  | Zn2  | 49.2(5)   |
| C44  | C43  | C42              | 118.2(10) | O7   | C33  | Zn2  | 73.1(5)   |
| C45  | C43  | C42              | 116.4(9)  | O7   | C33  | O6   | 122.2(9)  |
| C45  | C43  | C44              | 125.4(11) | C34  | C33  | Zn2  | 166.8(8)  |
| C43  | C45  | C46              | 121.0(10) | C34  | C33  | O6   | 118.0(10) |

**Table S3 Bond Angles for Zn-nMOF.**

| Atom             | Atom | Atom             | Angle/°  | Atom | Atom | Atom             | Angle/°   |
|------------------|------|------------------|----------|------|------|------------------|-----------|
| C61              | C55  | C54              | 119.9(8) | C34  | C33  | O7               | 119.7(10) |
| C56              | C55  | C54              | 119.0(9) | C6   | C7   | N2               | 116.8(9)  |
| C56              | C55  | C61              | 121.1(9) | C8   | C7   | N2               | 116.5(12) |
| O5               | Zn2  | O6               | 119.9(3) | C8   | C7   | C6               | 126.7(10) |
| N4               | Zn2  | O6               | 124.3(3) | C3   | C2   | C4               | 127.8(17) |
| N4               | Zn2  | O5               | 107.6(3) | C1   | C2   | C4               | 112.0(14) |
| N3               | Zn2  | O6               | 104.8(4) | C1   | C2   | C3               | 119.8(16) |
| N3               | Zn2  | O5               | 113.1(3) | C2   | C1   | N1               | 123.7(14) |
| N3               | Zn2  | N4               | 79.5(3)  | C30  | C32  | N4               | 125.6(10) |
| C33              | Zn2  | O6               | 29.2(4)  | C22  | C21  | N3               | 122.9(11) |
| C33              | Zn2  | O5               | 115.3(3) | C14  | C19  | C18              | 119.5(10) |
| C33              | Zn2  | N4               | 105.3(3) | C40  | C34  | C35              | 119.0(8)  |
| C33              | Zn2  | N3               | 126.7(4) | C33  | C34  | C35              | 121.6(9)  |
| O9 <sup>3</sup>  | Zn1  | O2               | 106.7(3) | C33  | C34  | C40              | 119.4(9)  |
| O10 <sup>3</sup> | Zn1  | O2               | 134.2(3) | O2   | C13  | Zn1              | 48.0(5)   |
| O10 <sup>3</sup> | Zn1  | O9 <sup>3</sup>  | 60.3(3)  | O1   | C13  | Zn1              | 72.7(6)   |
| N2               | Zn1  | O2               | 116.4(3) | O1   | C13  | O2               | 120.7(10) |
| N2               | Zn1  | O9 <sup>3</sup>  | 136.9(4) | C14  | C13  | Zn1              | 164.6(6)  |
| N2               | Zn1  | O10 <sup>3</sup> | 88.7(4)  | C14  | C13  | O2               | 117.0(8)  |
| N1               | Zn1  | O2               | 95.6(5)  | C14  | C13  | O1               | 122.2(8)  |
| N1               | Zn1  | O9 <sup>3</sup>  | 96.6(4)  | C28  | C29  | C30              | 120.9(12) |
| N1               | Zn1  | O10 <sup>3</sup> | 127.9(5) | C10  | C9   | C8               | 124.7(12) |
| N1               | Zn1  | N2               | 78.7(5)  | C16  | C15  | C14              | 119.8(12) |
| C13              | Zn1  | O2               | 29.2(3)  | O9   | C37  | Zn1 <sup>4</sup> | 56.3(6)   |
| C13              | Zn1  | O9 <sup>3</sup>  | 110.7(4) | O10  | C37  | Zn1 <sup>4</sup> | 65.8(6)   |
| C13              | Zn1  | O10 <sup>3</sup> | 109.6(3) | O10  | C37  | O9               | 121.5(10) |
| C13              | Zn1  | N2               | 107.5(4) | C36  | C37  | Zn1 <sup>4</sup> | 168.2(7)  |
| C13              | Zn1  | N1               | 122.5(4) | C36  | C37  | O9               | 118.4(11) |
| C37 <sup>3</sup> | Zn1  | O2               | 127.2(3) | C36  | C37  | O10              | 120.1(11) |
| C37 <sup>3</sup> | Zn1  | O9 <sup>3</sup>  | 30.9(4)  | C17  | C16  | O3               | 118.0(13) |
| C37 <sup>3</sup> | Zn1  | O10 <sup>3</sup> | 29.6(4)  | C15  | C16  | O3               | 121.2(13) |
| C37 <sup>3</sup> | Zn1  | N2               | 112.2(4) | C15  | C16  | C17              | 120.8(11) |
| C37 <sup>3</sup> | Zn1  | N1               | 113.2(4) | C9   | C8   | C7               | 118.2(11) |
| C37 <sup>3</sup> | Zn1  | C13              | 116.0(3) | C9   | C10  | C12              | 115.3(12) |
| C13              | O2   | Zn1              | 102.8(6) | C11  | C10  | C12              | 120.3(14) |
| C33              | O6   | Zn2              | 101.6(7) | C11  | C10  | C9               | 124.3(14) |

<sup>1</sup>1-X,1-Y,-1/2+Z; <sup>2</sup>1-X,1-Y,1/2+Z; <sup>3</sup>+X,+Y,-1+Z; <sup>4</sup>+X,+Y,1+Z

**Table S4**

| S.No | MOF                                                                                                                     | Loading Efficiency | Reference |
|------|-------------------------------------------------------------------------------------------------------------------------|--------------------|-----------|
| 1    | Zn <sub>8</sub> (Ad) <sub>4</sub> (BPDC) <sub>6</sub> O <sub>2</sub> (NH <sub>2</sub> (CH <sub>3</sub> ) <sub>2</sub> ) | 30.48 wt%          | 5         |
| 2    | Zn <sub>3</sub> (curcumin) <sub>27</sub> (DMA) <sub>3</sub> (ethanol)                                                   | 0.24 g/g           | 6         |
| 3    | [Zn <sub>2</sub> (1,4-bdc) <sub>2</sub> (dabco) <sub>n</sub> ]                                                          | 15 wt%             | 7         |
| 4    | [Zn (tbda)] <sub>n</sub>                                                                                                | 12.59%             | 8         |

**References**

1. Dolomanov, O.V., Bourhis, L.J., Gildea, R.J., Howard, J.A.K. & Puschmann, H. (2009), J. Appl. Cryst. 42, 339-341.
2. Bourhis, L.J., Dolomanov, O.V., Gildea, R.J., Howard, J.A.K., Puschmann, H. (2015). Acta Cryst. A71, 59-75.
3. Bourhis, L.J., Dolomanov, O.V., Gildea, R.J., Howard, J.A.K., Puschmann, H. (2015). Acta Cryst. A71, 59-75.
4. M.J. Frisch, et al., Gaussian 09, Revision D.01, Gaussian Inc, Wallingford CT, 2009.
5. Qin, J. S., Du, D. Y., Li, W. L., Zhang, J. P., Li, S. L., Su, Z. M., ... & Lan, Y. Q. (2012). N-rich zeolite-like metal-organic framework with sodalite topology: high CO<sub>2</sub> uptake, selective gas adsorption and efficient drug delivery. *Chemical Science*, 3(6), 2114-2118.

6. Su, H., Sun, F., Jia, J., He, H., Wang, A., & Zhu, G. (2015). A highly porous medical metal–organic framework constructed from bioactive curcumin. *Chemical Communications*, 51(26), 5774-5777.
7. Ta, T. T. H., Pham, N. T., & Do Ngoc, S. (2016). Metal–organic frameworks: state-of-the-art material for gas capture and storage. *VNU Journal of Science: Mathematics-Physics*, 32(1).
8. Dong, K., Wang, Z., Zhang, Y., Ren, J., & Qu, X. (2018). Metal–organic framework-based nanoplatfom for intracellular environment-responsive endo/lysosomal escape and enhanced cancer therapy. *ACS applied materials & interfaces*, 10(38), 31998-32005.
